# Supplementary material for: An MXD1-derived repressor peptide identifies noncoding mediators of MYC-driven cell proliferation
Source: PubMed Central journal article supplement — Proc Natl Acad Sci U S A. 2020 Mar 10;117(12):6571–9. doi: 10.1073/pnas.1921786117 (PMC7104257; doi:10.1073/pnas.1921786117), 2020-03-10
Supplement: pnas.1921786117.sapp.pdf [file pnas.1921786117.sapp.pdf]

## Supplementary Information for

An MXD1-derived repressor peptide identifies noncoding mediators of MYC-driven cell proliferation

Philipp Raffeiner, Jonathan R. Hart, Daniel García-Caballero, Liron Bar-Peled, Marc S. Weinberg, Peter K. Vogt

Corresponding author: [pkvogt@scripps.edu](mailto:pkvogt@scripps.edu)

## This PDF includes:

- SI Materials and Methods
- Supplemental Figures and Figure Legends
  - Figure S1: CRISPR-Cas9-induced promoter deletions fail to inhibit MALAT1 expression.
  - Figure S2: Transcriptome comparison between P493-6 and RAMOS, identification and validation of additional KRAB domains and sequence preference of sgRNAs.
  - Figure S3: CRISPRi-based competition assay.
  - Figure S4: Validation of selected noncoding loci.
  - Figure S5: Conditional repression of endogenous loci.
- Supplemental Tables
  - Table S1: Selected oligodeoxynucleotide sequences.
  - Table S2: PCR-primers used to generate guide library for next generation sequencing.
  - Table S3: Oligodeoxynucleotide and gBlock sequences for cloning of paired sgRNAs.

## Other supplementary materials for this manuscript include the following:

- Dataset S1: sgRNA sequences and their genomic location
- Dataset S2: RNAseq of RAMOS and P493-6
- Dataset S3: Results of CRISPR-sgRNA screens
- Dataset S4: Results of TRIM28 proteomics

## SI Materials and Methods

**DNA constructs.** To construct lenti-2×Guide constructs, oligodeoxynucleotides containing the paired guide sequences separated by *BsmBI* restriction sites (Table S3) were PCR-amplified and Gibson assembly-cloned into the *BsmBI* sites of lentiGuide-Puro (Addgene # 52963) (1). The resulting vectors were cut with *BsmBI* to insert the PCR-amplified gBlock containing the scaffold sequence of sgRNA A and the mouse U6 (mU6) promoter sequence (Table S3).

For conditional MCP-SID expression, the coding sequence of MXD1 (aa 2 to 32) was PCR-amplified and cloned into pLVX-TetOne-Puro (Clontech, Takara Bio), cut with *EcoRI/BamHI*. Lenti-guide(MS2)\_Zeo was prepared by replacing the puromycin resistance gene of lenti-sgRNA(MS2)\_Puro for a Zeocin resistance gene, using *BsiWI/MluI* sites. TRIM28 coding sequence was PCR-amplified from P493-6 cDNA using a forward primer containing the Flag-tag sequence, and the PCR product was ligated into the lentiCas9\_Blast vector backbone, cut with *XbaI/BamHI* to replace the Cas9 coding sequence (lenti-Flag-TRIM28\_Blast).

**CRISPR-Cas9-mediated deletion of promoter sequences.** P493-6 cells stably expressing Cas9 were prepared as described in the manuscript using LentiCas9\_Blast. Cells were then transduced with lenti-2×Guide constructs and selected with puromycin. CRISPR-Cas9-induced deletions were checked by PCR using genomic DNA as template and *MALAT1*-specific primers (Table S1).

**TRIM28 proteomics.**  $1 \times 10^7$  P493-6 cells per sample (high or low MYC) stably expressing FLAG-tagged TRIM28 or FLAG-METAP2 (control) were washed with ice-cold PBS and resuspended in IP lysis buffer (20 mM HEPES pH 7.5, 200 mM NaCl, 5% glycerol, 0.75% Triton X-100) supplemented with protease inhibitors (Thermo Fisher Scientific). After sonication, cell debris was removed by centrifugation, and lysates were precleared using protein A sepharose beads. Cleared lysates were incubated with FLAG-M2 magnetic beads (Sigma, 100  $\mu$ L 50:50 slurry) overnight while rotating at 4°C. Beads were washed four times with IP lysis buffer, and proteins were eluted from beads with 8 M urea. Protein samples were reduced in 10 mM DTT for 30 min at 65°C and subjected to alkylation with iodoacetamide (IAA) for 30 min at 37°C, all in 6 M urea. After proteolytic digestion with trypsin (Promega), digests were analyzed by liquid chromatography tandem mass spectrometry (LC-MS/MS). MS2 spectra data were extracted from the raw file using RAW Convertor (version 1.000; available at <http://fields.scripps.edu/downloads.php>). MS2 spectra data were searched using the ProLuCID algorithm (publicly available at <http://fields.scripps.edu/downloads.php>) using a reverse concatenated, non-redundant variant of the Human UniProt database (release-2012\_11). Cysteine residues were searched with a static modification for carboxyamidomethylation (+57.02146) and one differential modification for oxidized methionine (+15.9949). Spectral counts for proteins from FLAG-TRIM28 immunoprecipitates were compared to spectral counts for proteins from FLAG-METAP2 immunoprecipitates. Interacting proteins were classified as those proteins whose corresponding peptides were enriched by greater than 20-fold in FLAG-TRIM28 immunoprecipitates compared to FLAG-METAP2 immunoprecipitates.

**Analysis of ChIP-seq data.** MYC ChIP-seq data for P493-6 was downloaded from NCBI SRA accession numbers SRR444429 and SRR444430 (2). The reads were aligned to human genome version hg38.d1.vd1 using BWA aligner (3). The aligned reads were sorted using Sambamba (4). The regions surrounding the targeted transcriptional start sites were selected using biomaRt (5). Histograms of the selected regions were produced using HOMER annotatePeaks (6) and graphed in R (7).

## References:

1. Sanjana NE, Shalem O, & Zhang F (2014) Improved vectors and genome-wide libraries for CRISPR screening. *Nat Methods* 11(8):783-784.
2. Lin CY, et al. (2012) Transcriptional amplification in tumor cells with elevated c-Myc. *Cell* 151(1):56-67.
3. Li H & Durbin R (2009) Fast and accurate short read alignment with Burrows-Wheeler transform. *Bioinformatics* 25(14):1754-1760.
4. Tarasov A, Vilella AJ, Cuppen E, Nijman IJ, & Prins P (2015) Sambamba: fast processing of NGS alignment formats. *Bioinformatics* 31(12):2032-2034.
5. Durinck S, Spellman PT, Birney E, & Huber W (2009) Mapping identifiers for the integration of genomic datasets with the R/Bioconductor package biomaRt. *Nat Protoc* 4(8):1184-1191.
6. Heinz S, et al. (2010) Simple combinations of lineage-determining transcription factors prime cis-regulatory elements required for macrophage and B cell identities. *Mol Cell* 38(4):576-589.
7. R Core Team (2014) R: A language and environment for statistical computing. R Foundation for Statistical Computing, Vienna, Austria. <http://www.R-project.org/>

## Supplemental Figures

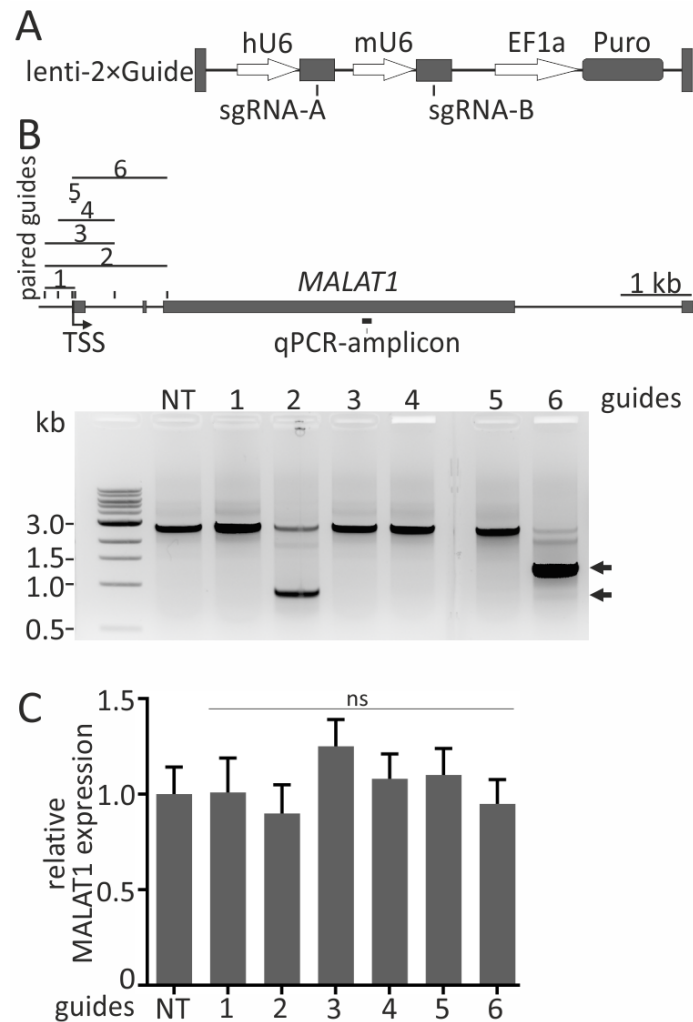

**Fig. S1. CRISPR-Cas9-induced promoter deletions fail to inhibit MALAT1 expression.** (A) Depiction of the lentiviral construct for expression of paired sgRNAs. EF1a, EF-1 alpha promoter; hU6, human U6 promoter; mU6, mouse U6 promoter; Puro, puromycin resistance gene. (B) Depiction of the *MALAT1* locus. Positions of sgRNAs and resulting deletions are indicated (upper panel). CRISPR-Cas9-induced deletions upon stable expression of Cas9 and indicated paired sgRNAs in P493-6 were investigated by PCR and agarose gel electrophoresis (lower panel). Arrows indicate PCR amplicons of successful deletions. NT, non-targeting guides; TSS, transcription start site. (C) Expression analysis by RT-qPCR using RNA from cells described in (B). Position of qPCR amplicon within *MALAT1* is indicated in (B). ns, not significant.

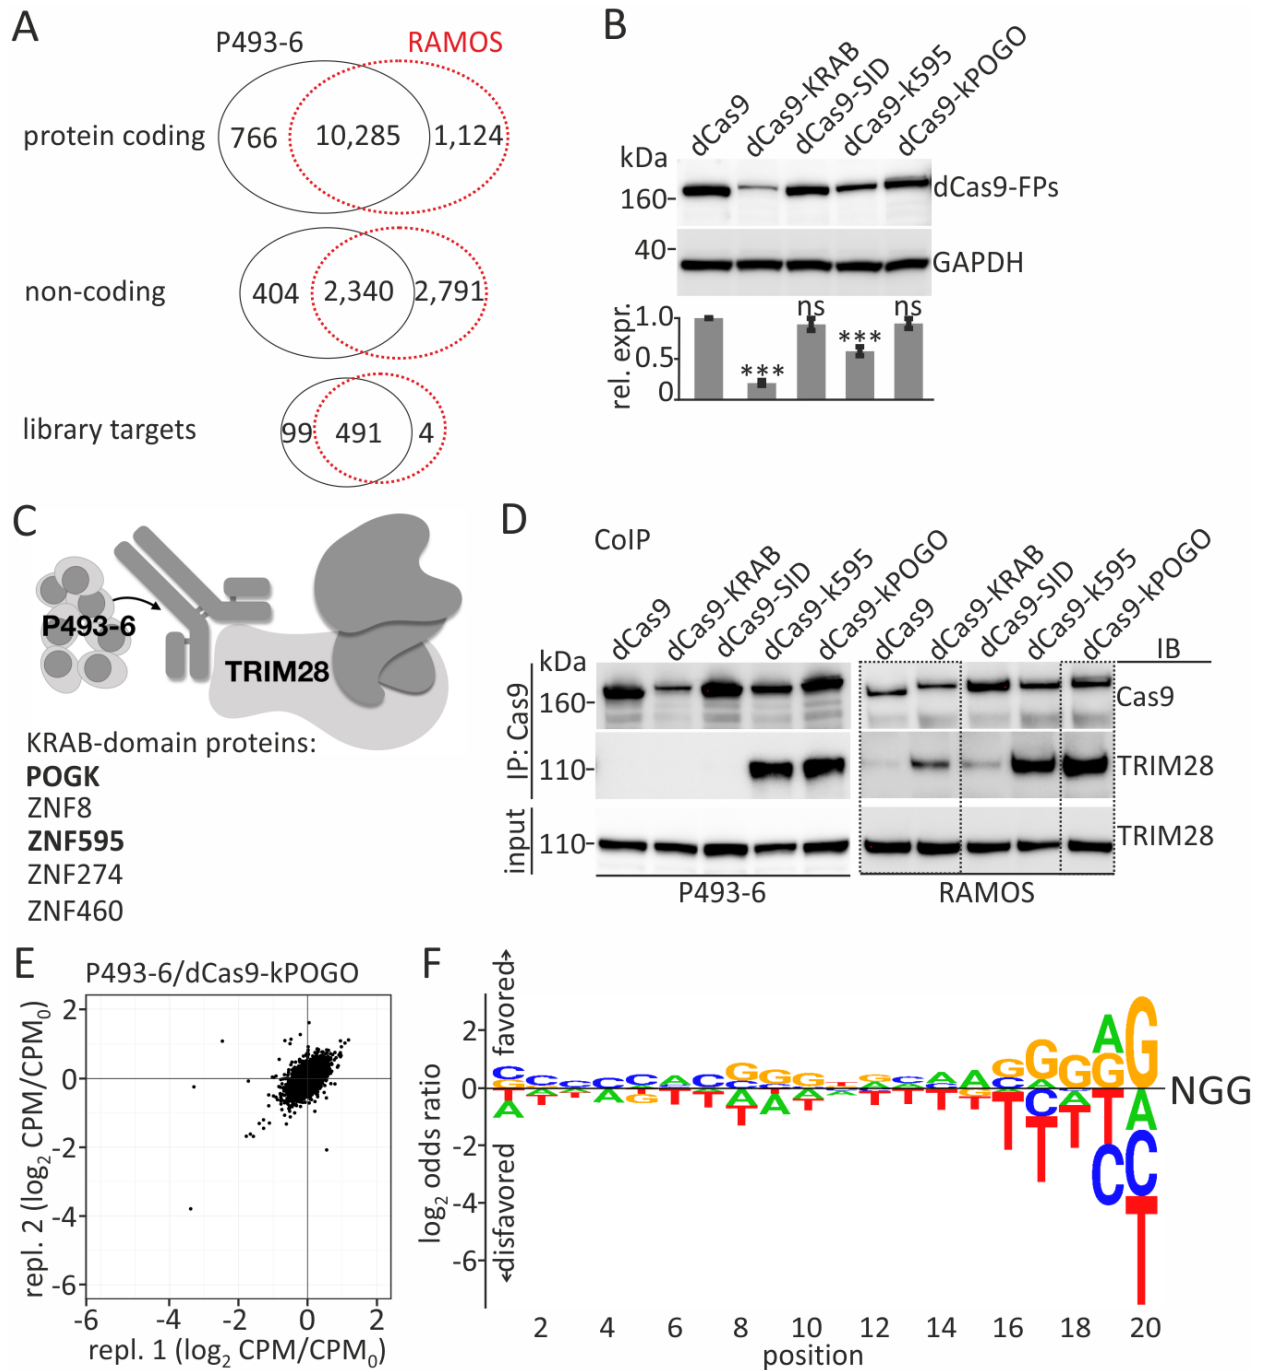

**Fig. S2. Transcriptome comparison between P493-6 and RAMOS, identification and validation of additional KRAB domains and sequence preference of sgRNAs.** (A) Venn diagram illustrating the transcriptome overlap between P493-6/MYC-ON and RAMOS, based on RNAseq data. (B) Expression of dCas9-fusion proteins in P493-6 cells was analyzed by immunoblotting. Densitometric quantification of three independent experiments, mean  $\pm$  SD. \*\*\*,  $p < 0.001$  using unpaired t-test; ns, not significant. (C) TRIM28 was immunoprecipitated from P493-6 lysates, and interacting proteins were

identified by mass spectrometry. (D) Protein-protein interaction between indicated dCas9-fusion proteins and TRIM28 was determined by co-IP in P493-6 and RAMOS cells. Dotted lines highlight sections of the RAMOS blot that are shown in main Fig. 1. IB, immunoblot; IP, immunoprecipitation; k595, KRAB domain of ZNF595; kPOGO, KRAB domain of POGK, KRAB, KRAB domain of ZNF10; SID, SIN3 interacting domain. (E) Pooled MYCncLibrary screen in P493-6/dCas9-kPOGO. CPM, counts per million of CRISPRi sample; CPM<sub>0</sub>, counts per million of control sample (P493-6, no dCas9). (F) Logo indicating the preference of nucleotide sequences that impact sgRNA efficiency. The heights of the letters are based on the log<sub>2</sub> odds ratio of nucleotide frequency of efficient guides in the P493-6/dCas9-SID screen.

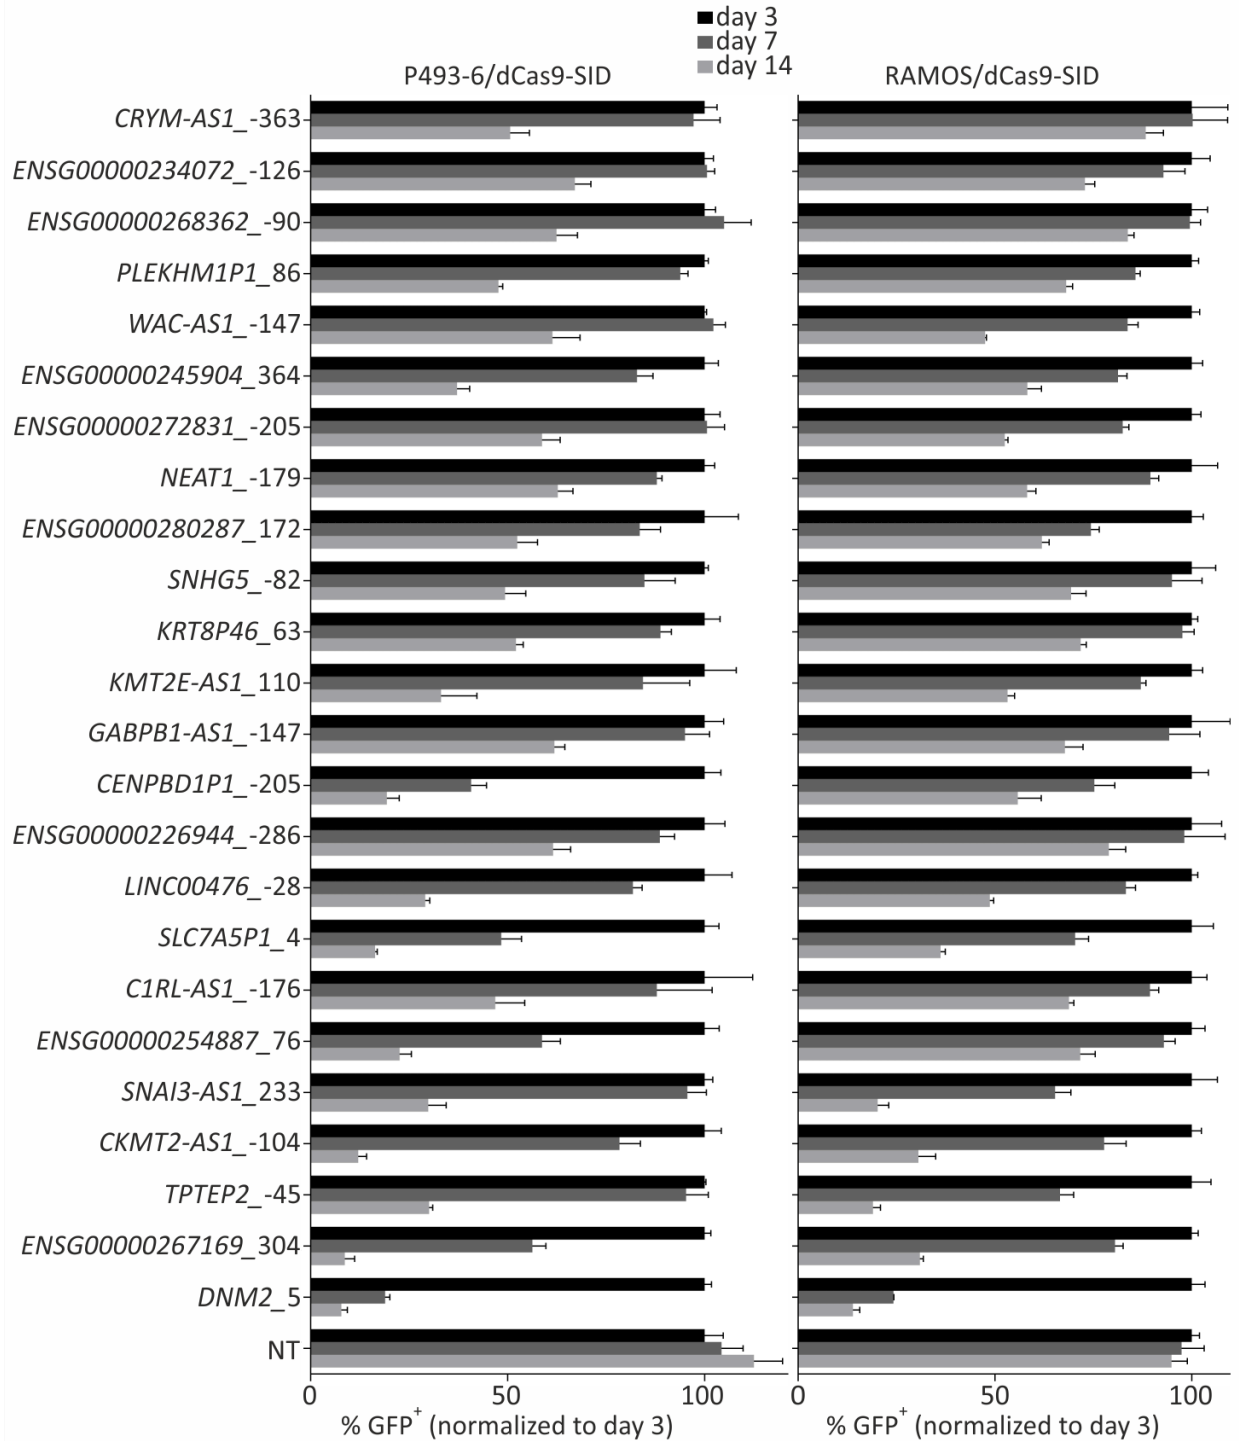

**Fig. S3. CRISPRi-based competition assay.** Cells were transduced with GFP-expressing sgRNA vectors targeting indicated genes (numbers indicate guide positions relative to TSS of gene) or a non-targeting (NT) control guide. GFP<sup>+</sup> cells were quantified by flow cytometry at indicated time points. Mean  $\pm$  SD of three replicates.

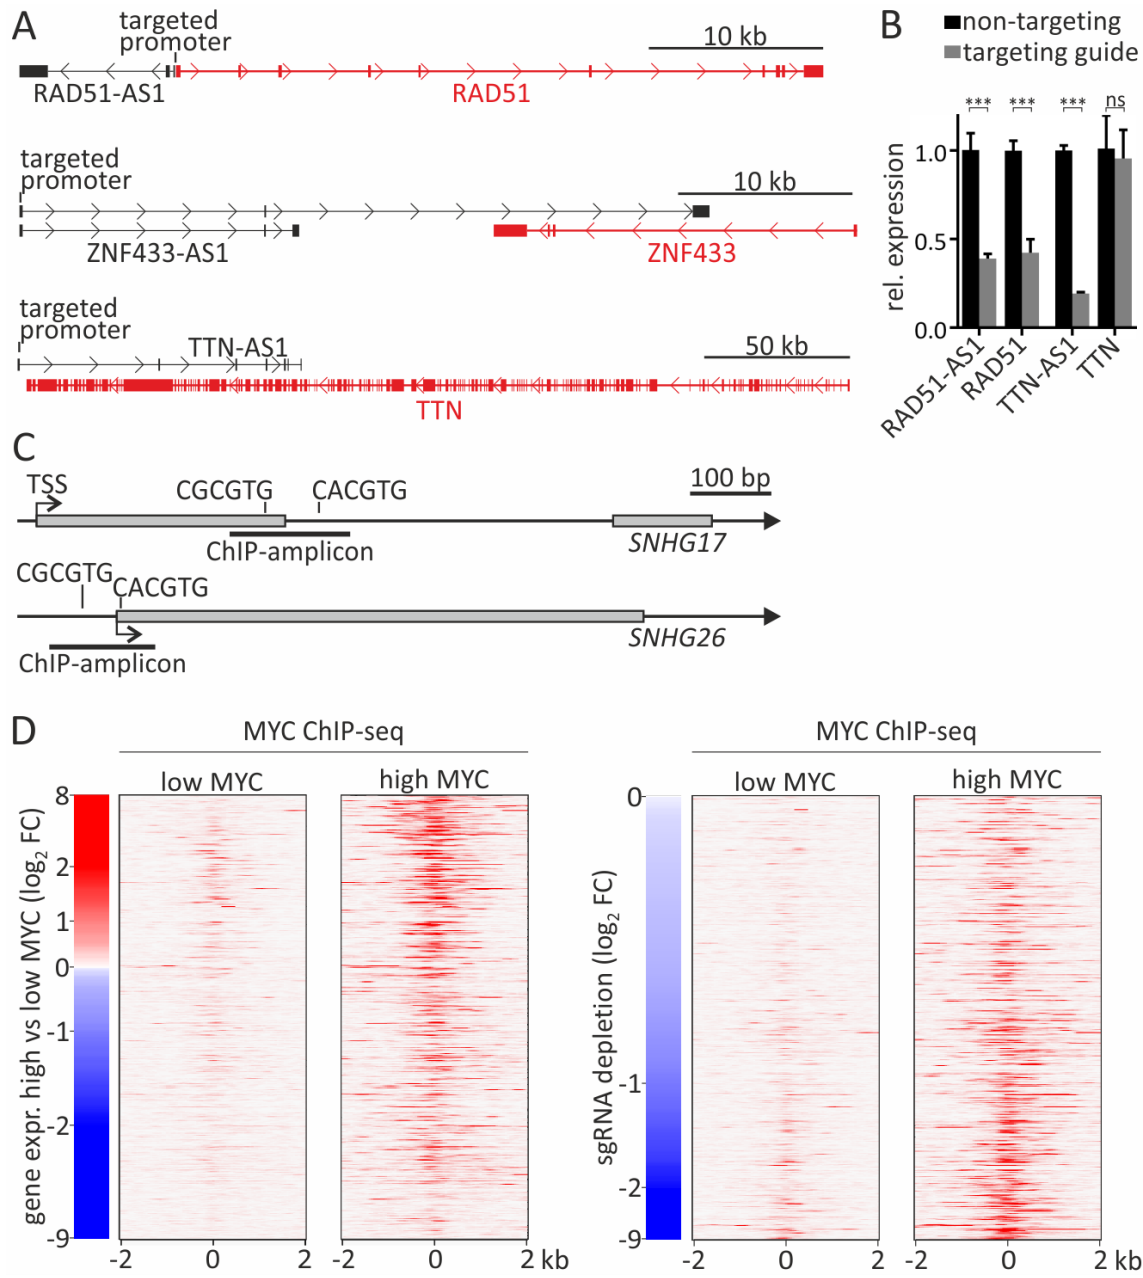

**Fig. S4. Validation of selected noncoding loci.** (A) Schematic depiction of sense-antisense pairs of the *RAD51-AS1*, *ZNF433-AS1* (two transcript variants are shown) and *TTN-AS1* loci. sgRNA-targeted promoters are indicated. (B) RT-qPCR experiments to determine CRISPRi-mediated repression of indicated sense-antisense gene pairs using guides that target the noncoding gene promoters in P493-6. Mean  $\pm$  SD of three replicates. \*\*\*,  $p < 0.001$ ; ns, not significant; determined using unpaired t-test. (C) Schematic depiction of the proximal promoters of *SNHG17* and *SNHG26*, the positions of the E-boxes are indicated. TSS, transcription start site. (D) P493-6 MYC ChIP-seq data analyses of library target genes ranked by MYC-dependent gene expression (left panel) or by sgRNA depletion upon library screens in P493-6 (right panel).



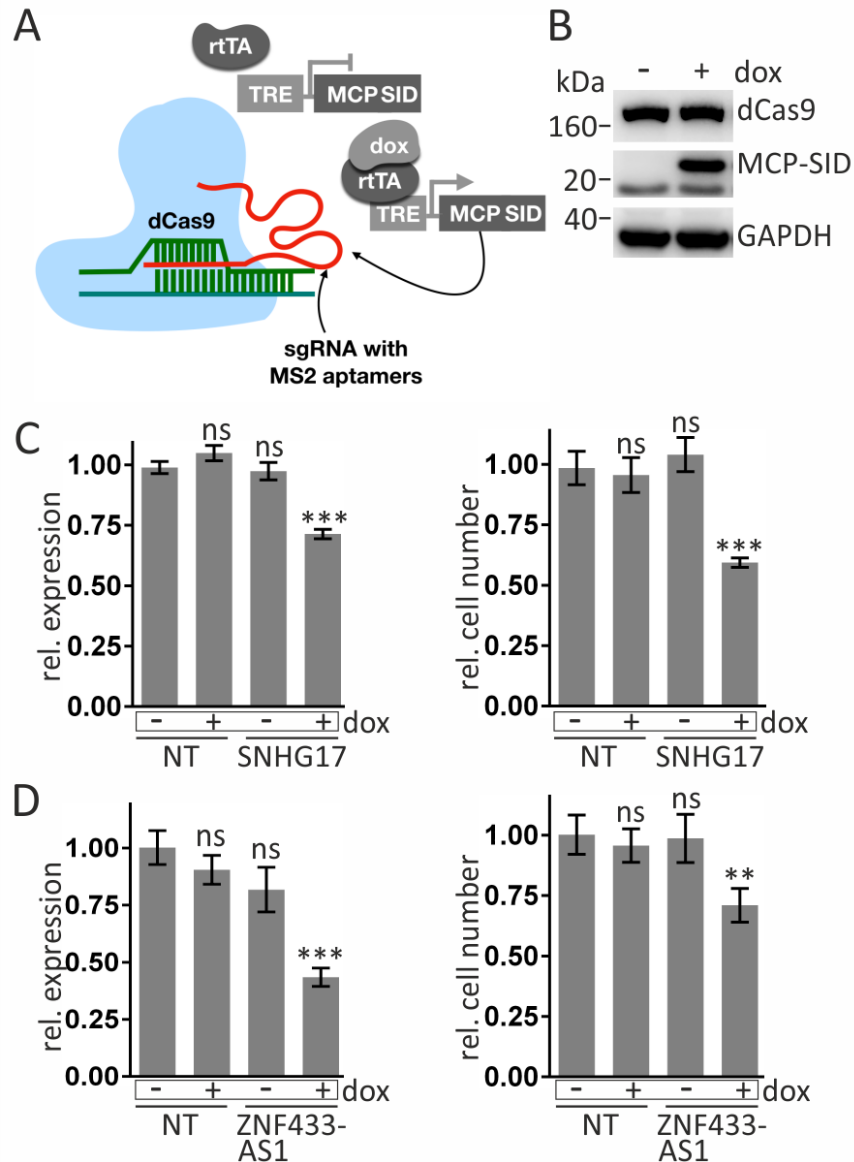

**Fig. S5. Conditional repression of endogenous loci.** (A) Schematic depiction of Doxycycline (dox)-regulatable (Tet-On) expression of MCP-SID that binds to the sgRNA-dCas9 complex to silence gene expression (rtTA, tetracycline transactivator; TRE, tetracycline response element). (B) dCas9-expressing RAMOS cells were stably transduced with a lentiviral vector that encodes for MCP-SID, controlled by tetracycline-response elements. Cells were incubated for 24 h with or without 0.1  $\mu$ g/ml dox and then subjected to Western blot analysis using antibodies directed against Cas9, MS2 and GAPDH. (C) and (D) Cells described in (B) were stably transduced with lentiviral vectors for expression of a non-targeting (NT) guide or guides targeting *SNHG17* or *ZNF433-AS1*. Cells were grown with or without dox for 4 d followed by RNA isolation and RT-qPCR analysis (left panels). Cell counts after 4 d incubation with or without dox (right panels). Mean  $\pm$  SD of three independent experiments. \*\*\*, p-value < 0.001; \*\*, p-value < 0.01, using unpaired t-test; ns, not significant.

## Supplemental Tables

**Table S1.** Selected oligodeoxynucleotide sequences.

| Target                                                       | Forward sequence (5' to 3')                                  | Reverse sequence (5' to 3')                                 |
|--------------------------------------------------------------|--------------------------------------------------------------|-------------------------------------------------------------|
| <b>Guide sequences</b> (Figs. 2B, 3, S3 and S4)              |                                                              |                                                             |
| Non-targ. (NT)                                               | CACCGCGAATTAGAAGCGTATTCCG                                    | AAACCGGAATACGCTTCTAATTCCG                                   |
| DNM2                                                         | CACCGCGCCTGAGAACCGGATGAGG                                    | AAACCCTCATCCGGTTCTCAGGCGC                                   |
| MALAT1                                                       | CACCGGAGGGACTGCGCAACCGGTG                                    | AAACCACCGGTTGCGCAGTCCCTCC                                   |
| RAD51-AS1                                                    | CACCGCGGGGTGAAGTCGGAGCGCG                                    | AAACCGCGCTCCGACTTCACCCCGC                                   |
| SNHG17                                                       | CACCGGCCCTGGCGTCGAGTGGCGG                                    | AAACCCGCCACTCGACGCCAGGGCC                                   |
| SNHG26                                                       | CACCGCCCTAACGGAGGCTTCCCCG                                    | AAACCGGGAAGCCTCCGTTAGGGC                                    |
| TTN-AS1                                                      | CACCGACTCCTGGCGTTGCGGAAGG                                    | AAACCCTTCGCAACGCCAGGAGTC                                    |
| ZNF433-AS1                                                   | CACCGCGGAGCCGGAACCCCGAGG                                     | AAACCCTCGGGGTTTCCGGCTCCGC                                   |
| <b>RT-qPCR primers</b> (Figs. 2B, 4, S3 and S4)              |                                                              |                                                             |
| DNM2                                                         | GATGAAGTCCGGCAGGAGATTG                                       | GTCGATGAGGGTCAAGTTCAAC                                      |
| MALAT1                                                       | GGAGAACTTCAGAAGAGCTTG                                        | CACCAATCCCAACCGTAACAG                                       |
| MYC                                                          | GCAAAAGCTCATTTCTGAAGAGG                                      | TTCATAGGTGATTGCTCAGGAC                                      |
| RAD51                                                        | GTGGCATAAATGCCAACGATG                                        | GCTTTGGCTTCACTAATTCCC                                       |
| RAD51-AS1                                                    | CTCCAGGAATGCGAGTAGGAG                                        | GAGTTCTCACCATCGCAGCTG                                       |
| SNHG17                                                       | GCAGAGAATGGAGAGTGAGGC                                        | CTCTGAGGCAGCTGAAGTCTC                                       |
| SNHG26                                                       | GGAATGTGAAGCTCGTGGTTC                                        | GATGCCTAGAACCTAGGCTG                                        |
| SNORA71A                                                     | GTGATCATAGGCTGCCTGTG                                         | GTGTGAAAGCTTCAGGGTTCCG                                      |
| TTN                                                          | CTTCCCTTTCTTGGTAAGCCTC                                       | TGAAGAGATTAAGGTAGAAGCTA                                     |
| TTN-AS1                                                      | GAGCTCCAACCTTTAGCAAGTGC                                      | GGTGATGCCTAAGGATGATTCC                                      |
| ZNF433-AS1                                                   | CAGCACTTTGGGAAGCAGAG                                         | GATTACAGGCATGTGCCATGAG                                      |
| <b>ChIP-qPCR primers</b> (Fig. 4)                            |                                                              |                                                             |
| SNHG17                                                       | CAGAGTAGCTGCGCGGACAG                                         | CAGTGTCTCGTCTCTTTGCC                                        |
| SNHG26                                                       | CTTGATCTCCGCAGTGCCCTC                                        | GAGAGGCGCGCCTAGGAAGC                                        |
| control                                                      | GTGGAGCTCAAGACCACGTC                                         | CTGACTGGTCAAGGGTGTGG                                        |
| <b>shRNA sequences</b> (Fig. 4)                              |                                                              |                                                             |
| control                                                      | CCGGTCCTAAGGTTAAGTCGCCCTCTCG<br>AGAGGGCGACTTAACCTTAGGATTTTTG | AATTCAAAATCCTAAGGTTAAGTCGCCCT<br>CTCGAGAGGGCGACTTAACCTTAGGA |
| ZNF433-AS1_1                                                 | CCGGTTGTCTCTCTATTGCCTGCCTCGA<br>GGCAGGCAATAGAGAGACAATTTTTG   | AATTCAAAATTGTCTCTCTATTGCCTGCC<br>TCGAGGCAGGCAATAGAGAGACAA   |
| ZNF433-AS1_2                                                 | CCGGTGCAGTTCTGTAGTATCATCTCGA<br>GATGATACTACAGAAGTGCATTTTTG   | AATTCAAAATGCAGTTCTGTAGTATCATC<br>TCGAGATGATACTACAGAAGTGCAT  |
| <b>PCR primers used to check genomic deletions</b> (Fig. S1) |                                                              |                                                             |
| MALAT1_locus                                                 | CCAGAGCAAGCATCAGGACTGTG                                      | CCTTCCTCATGCTACTCTTCTAAGTC                                  |

**Table S2.** PCR-primers used to generate guide library for next generation sequencing.

| <b>Primer name</b>          | <b>Sequence (5' to 3')</b>                                                                                     |
|-----------------------------|----------------------------------------------------------------------------------------------------------------|
| Fwd_1 ( <u>i5</u> -barcode) | AATGATACGGCGACCACCGAGATCTACACTCTTTCC<br>CTACACGACGCTCTTCCGATCTT <u>AAGTAGAGATATC</u><br>TTGTGGAAAGGACGAAACACCG |
| Fwd_2 ( <u>i5</u> -barcode) | AATGATACGGCGACCACCGAGATCTACACTCTTTCC<br>CTACACGACGCTCTTCCGATCTT <u>ACACGATCATATC</u><br>TTGTGGAAAGGACGAAACACCG |
| Fwd_3 ( <u>i5</u> -barcode) | AATGATACGGCGACCACCGAGATCTACACTCTTTCC<br>CTACACGACGCTCTTCCGATCTT <u>AACGCATTATATC</u><br>TTGTGGAAAGGACGAAACACCG |
| Fwd_4 ( <u>i5</u> -barcode) | AATGATACGGCGACCACCGAGATCTACACTCTTTCC<br>CTACACGACGCTCTTCCGATCTT <u>CATGATCGATATC</u><br>TTGTGGAAAGGACGAAACACCG |
| Fwd_5 ( <u>i5</u> -barcode) | AATGATACGGCGACCACCGAGATCTACACTCTTTCC<br>CTACACGACGCTCTTCCGATCTT <u>CGTTACCAATATC</u><br>TTGTGGAAAGGACGAAACACCG |
| Fwd_6 ( <u>i5</u> -barcode) | AATGATACGGCGACCACCGAGATCTACACTCTTTCC<br>CTACACGACGCTCTTCCGATCTT <u>TCCTTGGTATATC</u><br>TTGTGGAAAGGACGAAACACCG |
| Rev_1 ( <u>i7</u> -barcode) | CAAGCAGAAGACGGCATAACGAGAT <u>ACAGGTATGTG</u><br>ACTGGAGTTCAGACGTGTGCTCTTCCGATCTGCCA<br>AGTTGATAACGGACTAGCCTT   |
| Rev_2 ( <u>i7</u> -barcode) | CAAGCAGAAGACGGCATAACGAGAT <u>AACGCATTGTG</u><br>ACTGGAGTTCAGACGTGTGCTCTTCCGATCTGCCA<br>AGTTGATAACGGACTAGCCTT   |

**Table S3.** Oligodeoxynucleotide and gBlock sequences for cloning of paired sgRNAs.

| <b>Name</b>                                               | <b>Sequence (5' to 3')</b>                                                                                                                                                                                                                                                                                                                                                                                                                                                                            |
|-----------------------------------------------------------|-------------------------------------------------------------------------------------------------------------------------------------------------------------------------------------------------------------------------------------------------------------------------------------------------------------------------------------------------------------------------------------------------------------------------------------------------------------------------------------------------------|
| MALAT1_1                                                  | AAAGGACGAAACACCGATGACGTGCGAGACTATAGTTTGGAGACG<br>CGATCGCGTCTCGTTTGTATGGCGCTGCGCTTAAGGTTTTAGAGCT<br>AGAAATAGCA                                                                                                                                                                                                                                                                                                                                                                                         |
| MALAT1_2                                                  | AAAGGACGAAACACCGATGACGTGCGAGACTATAGTTTGGAGACG<br>CGATCGCGTCTCGTTTGC GCCCGAGCTGTGCGGTGTTTTAGAGC<br>TAGAAATAGCA                                                                                                                                                                                                                                                                                                                                                                                         |
| MALAT1_3                                                  | AAAGGACGAAACACCGATGACGTGCGAGACTATAGTTTGGAGACG<br>CGATCGCGTCTCGTTTGAATTTCCGTGCGGGCCGGTTTTAGAGC<br>TAGAAATAGCA                                                                                                                                                                                                                                                                                                                                                                                          |
| MALAT1_4                                                  | AAAGGACGAAACACCGGCACAGGCGTTAGGGCGGTTTTGGAGAC<br>GCGATCGCGTCTCGTTTGAATTTCCGTGCGGGCCGGTTTTAGAG<br>CTAGAAATAGCA                                                                                                                                                                                                                                                                                                                                                                                          |
| MALAT1_5                                                  | AAAGGACGAAACACCGGGACTGCGCAACCGGTGGTTTTGGAGAC<br>GCGATCGCGTCTCGTTTGTATGGCGCTGCGCTTAAGGTTTTAGAG<br>CTAGAAATAGCA                                                                                                                                                                                                                                                                                                                                                                                         |
| MALAT1_6                                                  | AAAGGACGAAACACCGGGACTGCGCAACCGGTGGTTTTGGAGAC<br>GCGATCGCGTCTCGTTTGC GCCCGAGCTGTGCGGTGTTTTAGAG<br>CTAGAAATAGCA                                                                                                                                                                                                                                                                                                                                                                                         |
| gBlock<br>(scaffold of<br>guide A and<br>mU6<br>promoter) | CTCATTTACAACCGTCTCCGTTTAAGAGCTATGCTGGAAACAGCA<br>TAGCAAGTTTAAATAAGGCTAGTCCGTTATCAACTTGAAAAAGTG<br>GCACCGAGTCGGTGCTTTTTTTGGATCCGATCCGACGCCGCCATC<br>TCTAGGCCCGCGCCGGCCCCCTCGCACAGACTTGTGGGAGAAG<br>CTCGGCTACTCCCCTGCCCGGTTAATTTGCATATAATATTTCTTA<br>GTAACTATAGAGGCTTAATGTGCGATAAAAGACAGATAATCTGTT<br>CTTTTTAATACTAGCTACATTTTACATGATAGGCTTGGATTTCTATA<br>AGAGATACAAATACTAAATTATTATTTAAAAAACAGCACAAAAGG<br>AAACTCACCTAACTGTAAAGTAATTGTGTGTTTTGAGACTATAAA<br>TATCCCTTGGAGAAAAGCCTTGTGTTGAGAGACGTACAAAGATC |
